# Supplementary material for: The Death Risk Factors of Patients Undergoing Re-Exploration For Bleeding or Tamponade After Isolate Off-Pump Coronary Artery Bypass Grafting: A Case-Control Study
Source: Research Square preprint supplement (doi:10.21203/rs.3.rs-190863/v1), 2021-02-15
Supplement: Supplementary file 2 [file 64e69048ef12baeb81e0ec63.xlsx]

## Sheet: Table
Table1 Preoperative patient characteristics
Risk factor	Survival Group (N=42)	Death Group (N=16)	p Value
Sex, male, (%)	36(85.71%)	12(75%)	0.564
Age, Years, Mean±SD	64.67±8.02	63.75±10.10	0.719
BMI, kg/m2, Mean±SD	24.02±3.23	26.24±3.52	0.030
Hypertension, n, (%)	25(59.52%)	11(68.75%)	0.517
Diabetes, n, (%)	17(40.48%)	7(43.75%)	0.821
Carotid artery stenosis, n, (%)	17(47.22%)	9(69.23%)	0.173
Cerebral infarction, n, (%)	8(19.05%)	5(31.25%)	0.520
Heart failure, n, (%)	10(23.81%)	10(66.67%)	0.003
Lesser degrees of respiratory dysfunction, n, (%)	17(47.22%)	6(42.86%)	0.781
Lesser degrees of hepatic dysfunction, n, (%)	11(27.5%)	4(26.67%)	1.000
Lesser degrees of renal dysfunction, n, (%)	7(17.5%)	2(13.33%)	0.895
Time between myocardial infarction and surgery, days, (IQR)	14(6)	11.5(11)	0.239
Note: BMI, body mass index; SD, standard deviation; carotid artery stenosis was diagnosed by doppler
ultrasonography
Table2 Biochemical criterion during hospitalization
Risk factor	Survival Group (N=42)	Death Group (N=16)	p Value
Before OPCABG
cTnT, ug/L, (IQR)	0.019(0.02)	0.073(0.68)	0.028
PCO2, mmHg, Mean±SD	39.14±4.71	38.41±5.70	0.648
PO2, mmHg, (IQR)	83(51)	96.4(55)	0.804
lactic acid, mmol/L, Mean±SD	1.48±0.62	1.38±0.78	0.621
Before re-exploration
ALT, n, (%)	19(50%)	4(25%)	0.309
creatinine, n, (%)	10(26.32%)	3(18.75%)	1.000
cTnT, ug/L, (IQR)	0.11(2.04)	0.54(7.42)	0.069
PCO2, mmHg, Mean±SD	47.39±11.97	44.16±10.08	0.343
PO2, mmHg, (IQR)	67.9(39.9)	59.35(12.13)	0.689
lactic acid, mmol/L, Mean±SD	3±5.75	9.2±11.93	0.011
After re-exploration
ALT, n, (%)	25(60.98%)	14(100%)	0.128
creatinine, n, (%)	17(41.16%)	14(100%)	0.003
cTnT, ug/L, (IQR)	0.17(1.92)	2.44(7.79)	0.124
PCO2, mmHg, (IQR)	43.3(15.6)	45.55(22.55)	0.021
PO2, mmHg, (IQR)	54.8(21.05)	59.7(34.87)	0.465
lactic acid, mmol/L, Mean±SD	2.9±2.5	10.45±14.38	＜0.001
Note: cTnT, cardiac troponin T; PCO2, partial pressure of carbon dioxide; SD, standard deviation; PO2,
partial pressure of oxygen; ALT, alanine transaminase
Table3 Other indicators during hospitalization
Risk factor	Survival Group (N=42)	Death Group (N=16)	p Value
IABP, n, (%)	18(42.86%)	12(75%)	0.029
CRRT, n, (%)	5(11.69%)	9(56.25%)	＜0.001
FFP, ml, (IQR)	3260(3290)	13552(25450)	0.050
Red blood cell, units,(IQR)	8(5.5)	14(19.75)	0.201
Platelet transfusion, n, (%)	4(9.52%)	7(43.75%)	0.009
Cryoprecipitate transfusion, n, (%)	17(40.48%)	6(37.5%)	0.836
Time of re-exploration, hours, (IQR)	130(45)	225(64)	0.002
Note: IABP, intra-aortic ballon pump; CRRT, continuous renal replacement therapy; FFP, fresh frozen
plasma; 1 units Red blood cell means red blood cells extracted from 200ml of blood
